# Supplementary material for: Removal of highly dispersive microspheres from wastewater using modified spirulina hetero-coagulation and their application in flame retardancy
Source: Royal Society of Chemistry journal article supplement (doi:10.1039/d1ma01121a), 2021-12-20
Supplement: d1ma01121a1.pdf [file d1ma01121a1.pdf]

## Supporting Information

### **Removal of Highly Dispersive Microspheres from Wastewater Using Modified Spirulina and Their Application in Flame Retardancy**

*Gaoda Zheng<sup>a,b</sup>, Zhihao Cai<sup>b</sup>, Ziyi Yu<sup>b</sup>, Yuqing Yang<sup>b</sup>, Hui Ye<sup>b</sup>, Zheng Qin<sup>b</sup>, Shiyu Zhang<sup>\*b</sup> and Xiaobing Zuo<sup>\*a,b</sup>*

<sup>a</sup>College of Chemistry, Chemical Engineering and Materials Science, Soochow University, Suzhou, 215123, People's Republic of China.

<sup>b</sup>School of Materials Engineering, Changshu Institute of Technology, Suzhou, 215500, People's Republic of China.

\* Corresponding author: Shiyu Zhang, Xiaobing Zuo

E-mail addresss: zhangshiyu@cslg.edu.cn; [zuoxiaobing@cslg.edu.cn](mailto:zuoxiaobing@cslg.edu.cn)

## Table of contents:

1. Supplementary Table (Table S1-S2)
2. Supplementary Figures (Figure S1–S6)

### 1. Supplementary Table

**Table S1.** EDS spectrum of PTFE and PTFE/PSAN

| Element<br>Specimens | C element<br>mass (wt%) | N element<br>mass (wt%) | F element<br>mass (wt%) |
|----------------------|-------------------------|-------------------------|-------------------------|
| PTFE                 | 45.30                   | 0                       | 54.70                   |
| PTFE/PSAN            | 78.82                   | 6.45                    | 14.71                   |

**Table S2.** demulsification time

| Samples                 | H <sub>2</sub> SO <sub>4</sub> | Spirulina | STP10 | STP20 | STP30 | STP40 | STP50 |
|-------------------------|--------------------------------|-----------|-------|-------|-------|-------|-------|
| Demulsification<br>Time | 180 s                          | no        | 10 s  | 10 s  | 10 s  | 15 s  | 15 s  |

### 2. Supplementary Figures

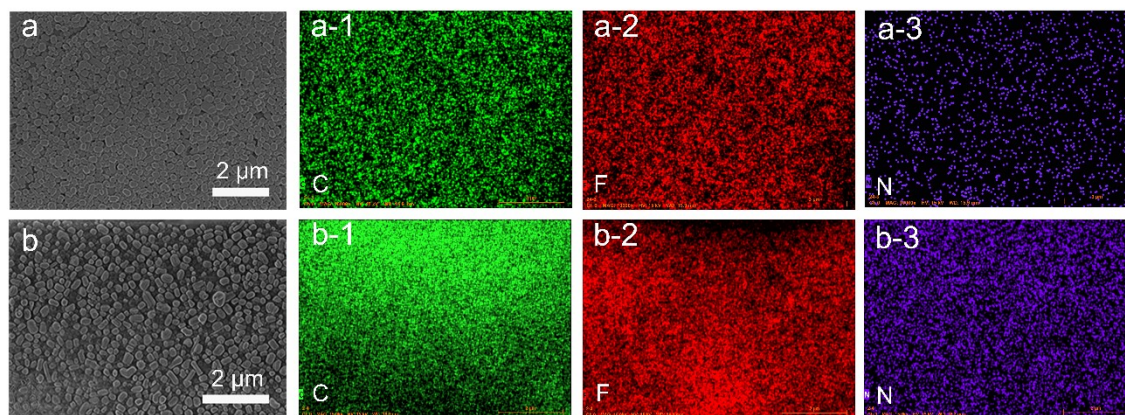

**Figure S1.** (a) SEM elemental mapping images of PTFE and (b) SEM elemental mapping images of PTFE/PSAN.

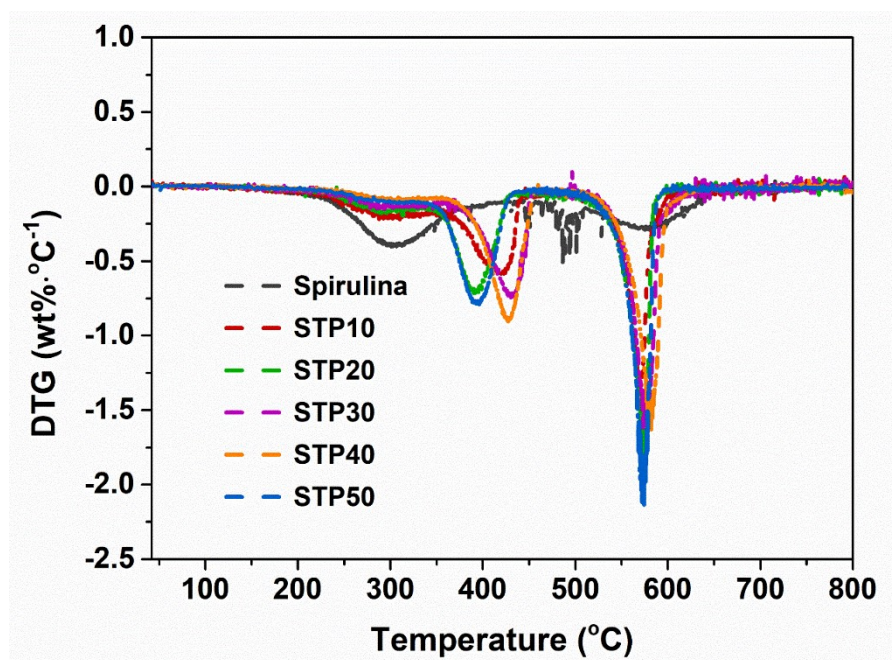

**Figure S2.** DTG curves of spirulina, STP10, STP20, STP30, STP40 and STP50

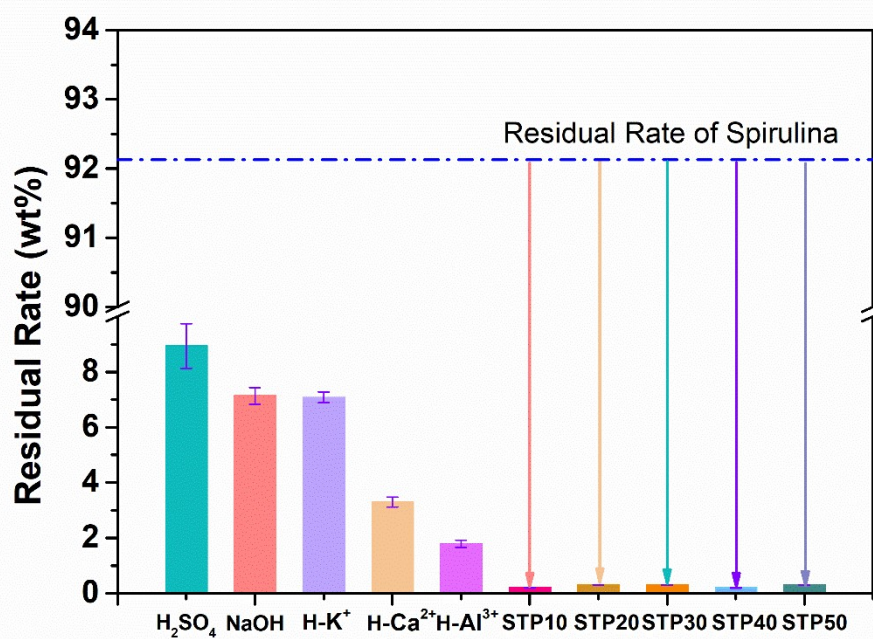

**Figure S3.** residual rate of Control, SP, STP10, STP20, STP30, STP40 and STP50

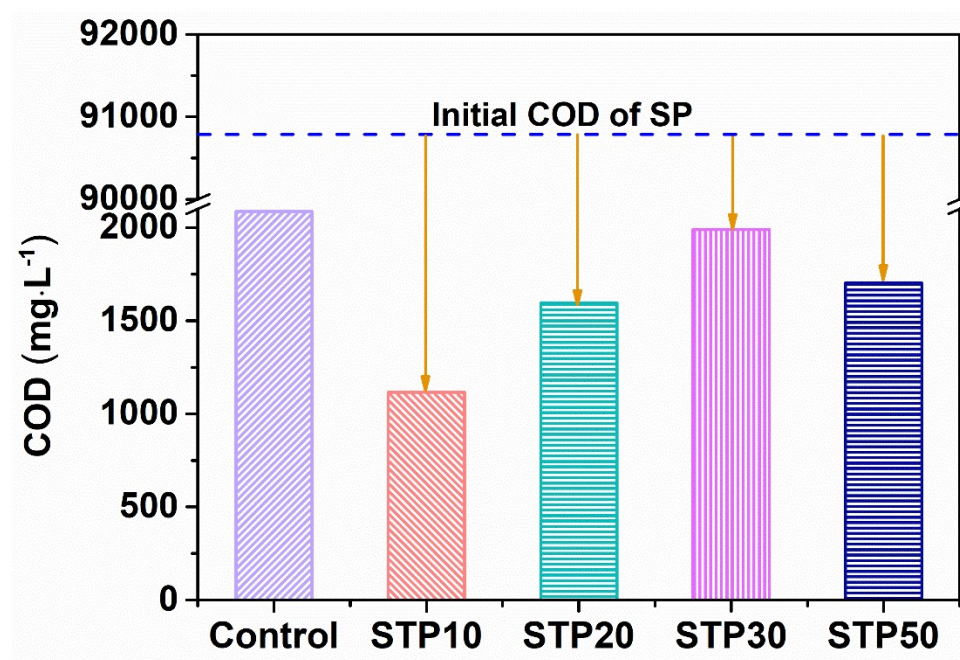

**Figure S4.** COD removal of upper residual liquid of Control, SP, STP10, STP20, STP30 and STP50

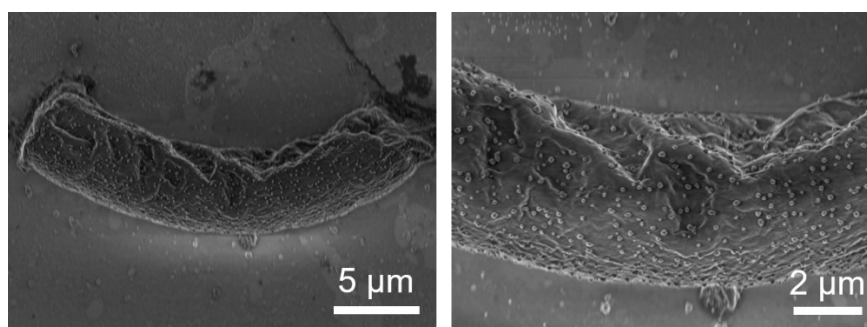

**Figure S5.** surface image of SP

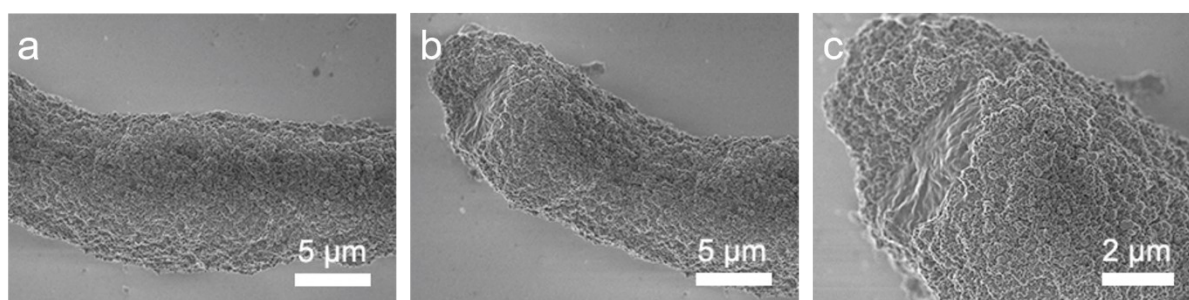

**Figure S6.** surface image of STP40

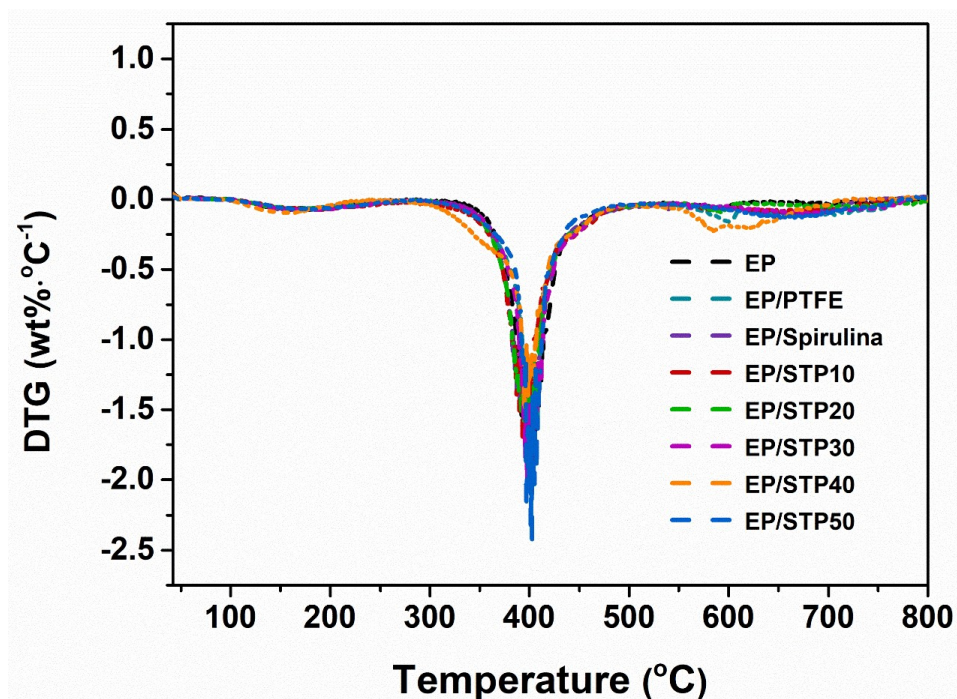

**Figure S7.** DTG curves of EP, EP/PTFE, EP/Spirulina, EP/STP10, EP/STP20, EP/STP30, EP/STP40 and EP/STP50

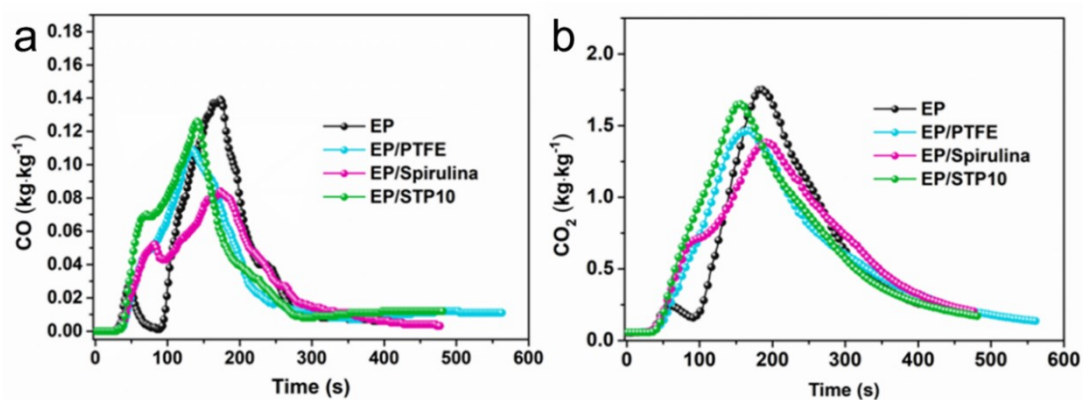

**Figure S8.** (a) CO production, (b) CO<sub>2</sub> production of EP, EP/PTFE, EP/Spirulina, EP/STP10 and the controls as a function of the burning time

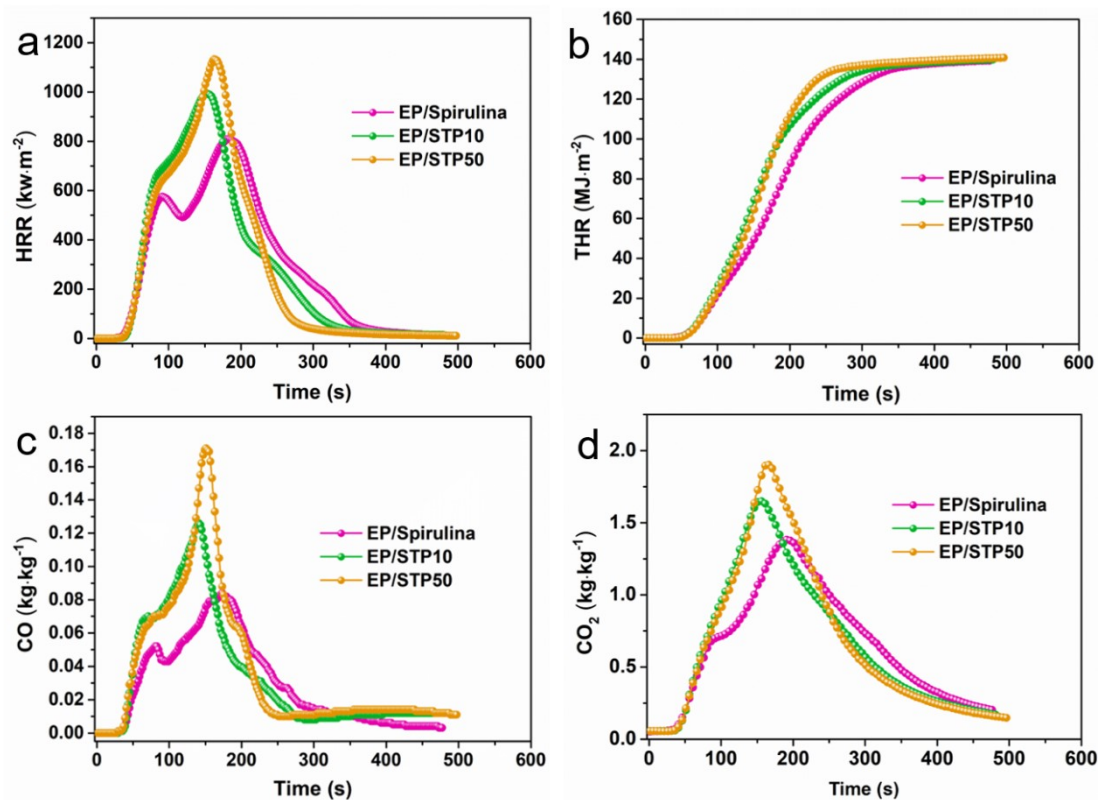

**Figure S9.** (a) HRRs, (b) THR, (c) CO production, (d) CO<sub>2</sub> production of EP/Spirulina, EP/STP10, EP/STP50 and the controls as a function of the burning time

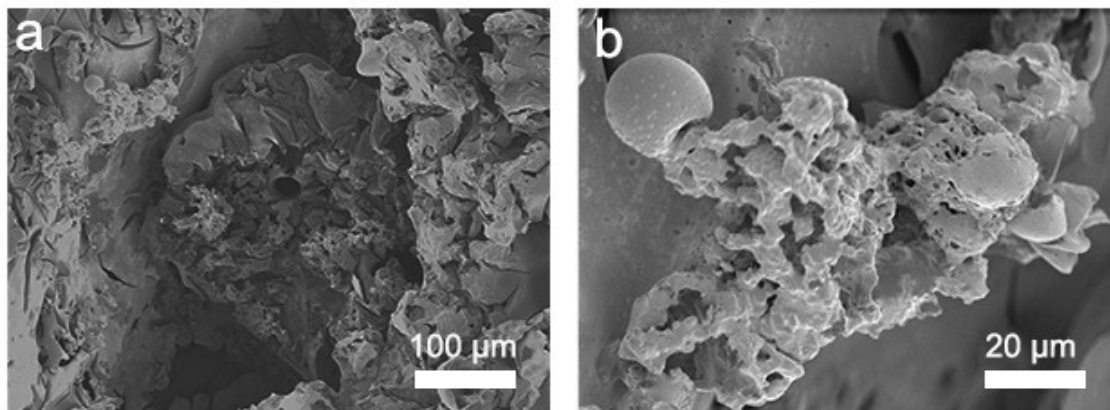

**Figure S10.** SEM images of EP/STP50 residues after cone calorimeter tests
